# Supplementary material for: Identification of Polo-like kinase 1 interaction inhibitors using a novel cell-based assay
Source: PubMed Central journal article supplement (PMC5118709; doi:10.1038/srep37581), 2016-11-22
Supplement: srep37581-s1.pdf [file srep37581-s1.pdf]

**Identification of Polo-like kinase 1 interaction inhibitors  
using a novel cell-based assay**

Karine Normandin<sup>1</sup>, Jean-François Lavallée<sup>1</sup>, Marie Futter<sup>1</sup>, Alexandre Beaudrait<sup>1</sup>, Jean Duchaine<sup>1</sup>, Sébastien Guiral<sup>1</sup>, Anne Marinier<sup>1,2</sup> & Vincent Archambault<sup>1,3\*</sup>

<sup>1</sup>Institute for Research in Immunology and Cancer, Université de Montréal;

<sup>2</sup>Département de chimie, Université de Montréal; <sup>3</sup>Département de biochimie et médecine moléculaire, Université de Montréal.

\*Corresponding author: [vincent.archambault.1@umontreal.ca](mailto:vincent.archambault.1@umontreal.ca)

**SUPPLEMENTARY FIGURES AND TABLES**

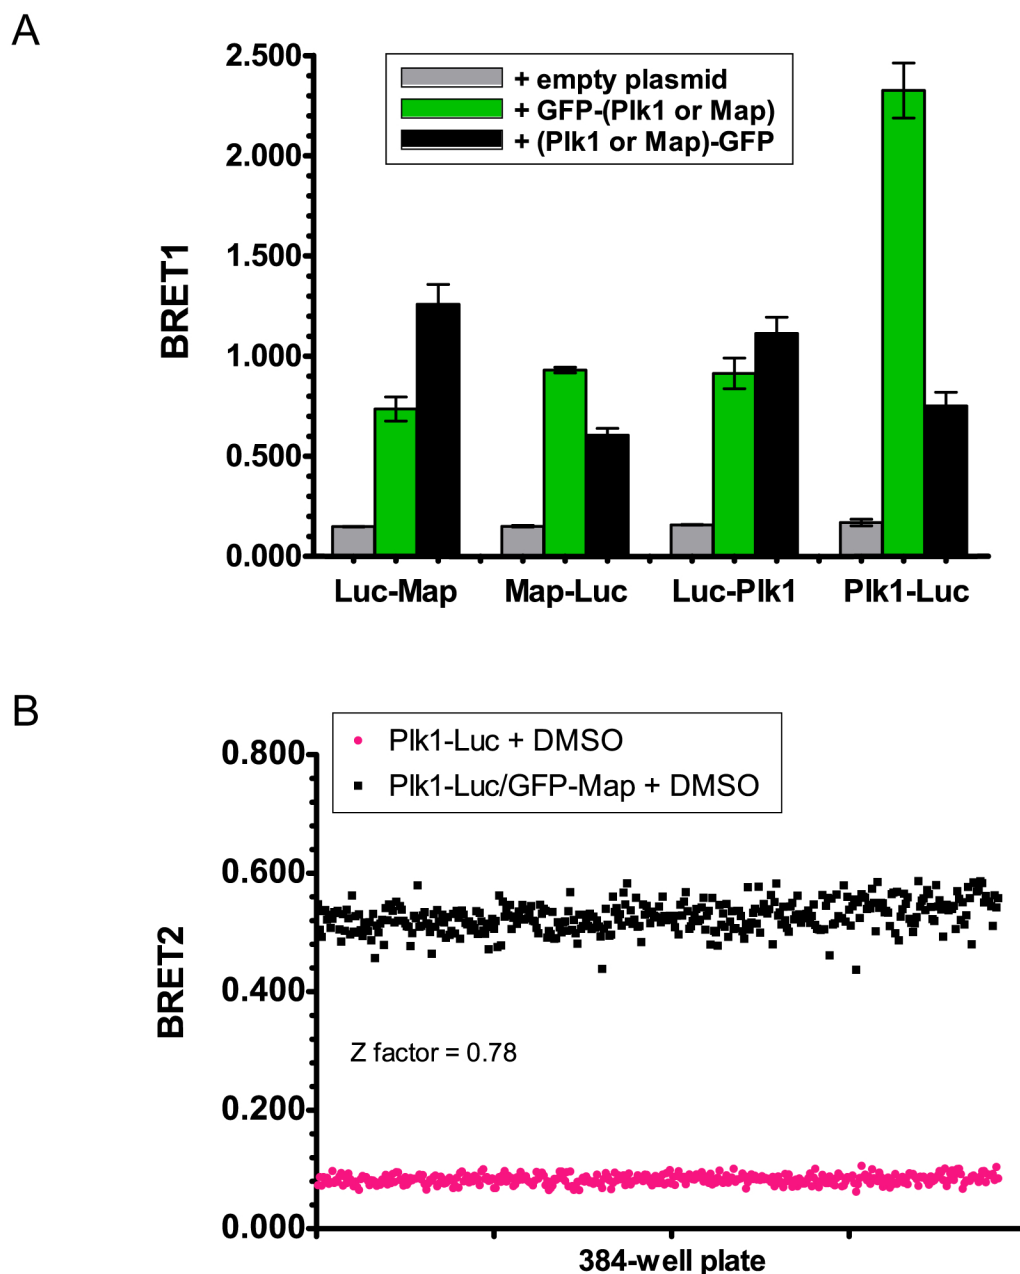

**Figure S1. Development of the BRET assay used in the screen.** A. BRET results for all combinations of Plk1 and Map<sub>254-416</sub> tagged with RLucII and GFP10 on their N-terminus or C-terminus. Experiment was performed in triplicate. Error bars: standard deviation. The Plk1-Luc/GFP-Map combination was selected because it produced the highest BRET dynamic window. Clonal stable cell lines co-expressing these proteins were then generated. B. Statistical validation of the BRET assay. One 384-well plate containing stable HEK293T Plk1-Luc/GFP-Map cells and one 384-well plate containing stable HEK293T Plk1-Luc cells (negative control) were treated for 2 hours with 0.5% DMSO (vehicle) before reading the BRET2. A Z-factor of 0.78 was obtained.

Cpd 16

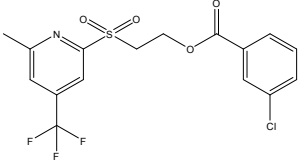

Cpd 46

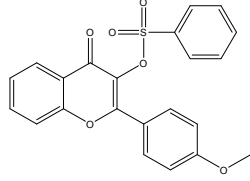

Cpd 69

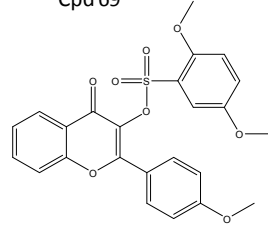

Cpd 122

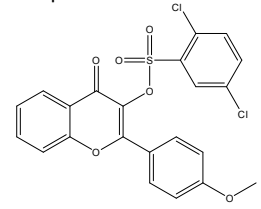

**Figure S2. Chemical structures of the BRET hits also active in the mitotic index assay.**

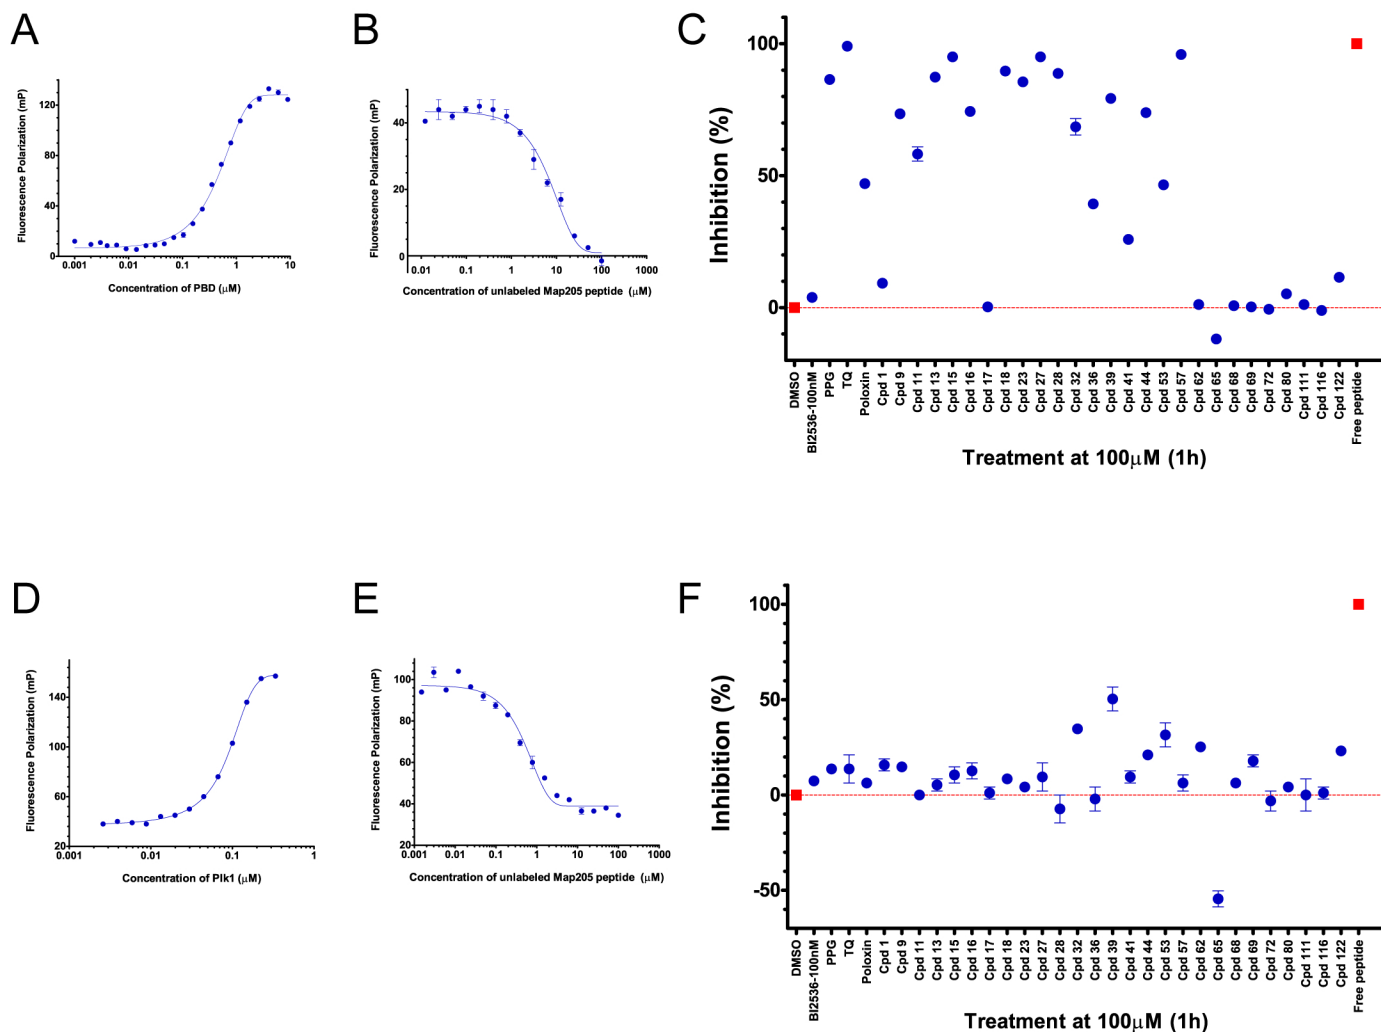

**Figure S3. Compounds identified interfere with the interaction between a Map peptide and the PBD alone (A-C) or whole Plk1 (D-F) in a Fluorescence Polarization assay.** A and D. Binding of the labeled FITC-Map peptide (10 nM) with increasing concentrations of His-PBD<sub>326-603</sub> (A) or with whole Plk1 (D). B and E. Competitive displacement of the FITC-Map peptide by the unlabeled Map peptide, added at increasing concentrations, with the Plk1 His-PBD<sub>326-603</sub> (used at EC<sub>65</sub> = 700 nM) (B) or with the whole Plk1 (used at EC<sub>65</sub> = 125 nM) (E). C and F. Targeted screen of selected compounds in the FP assay with the Map peptide. His-PBD<sub>326-603</sub> (1800 nM) (C) and whole Plk1 (130 nM) (F) were treated for 1 hour with different compounds at 100 μM before addition of the FITC-Map peptide. Values are means of duplicates from the same experiment (± range between values).

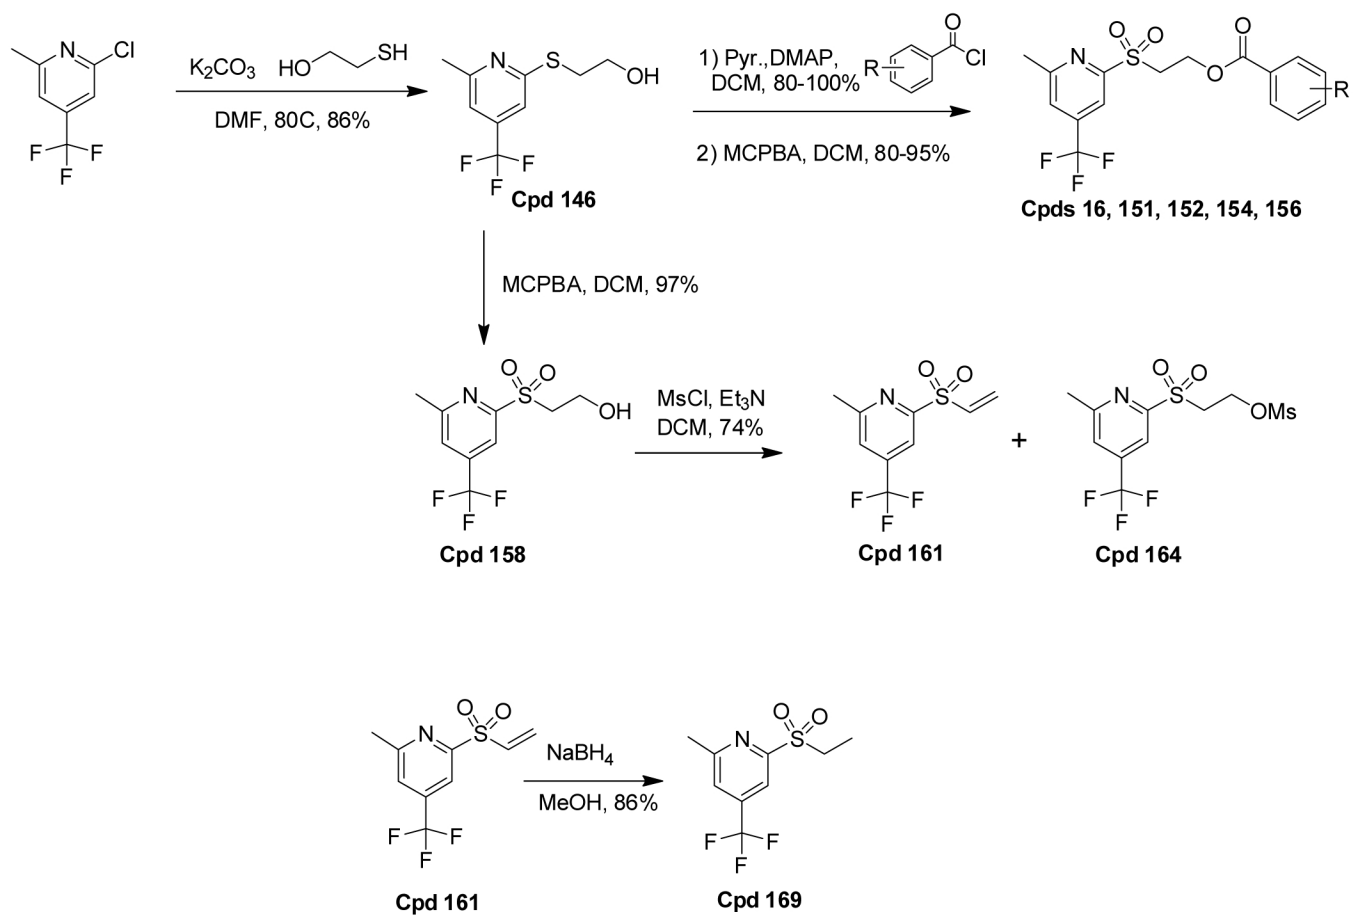

**Figure S4. Synthesis schemes for SAR around Cpd 16.** Other compounds were obtained commercially.

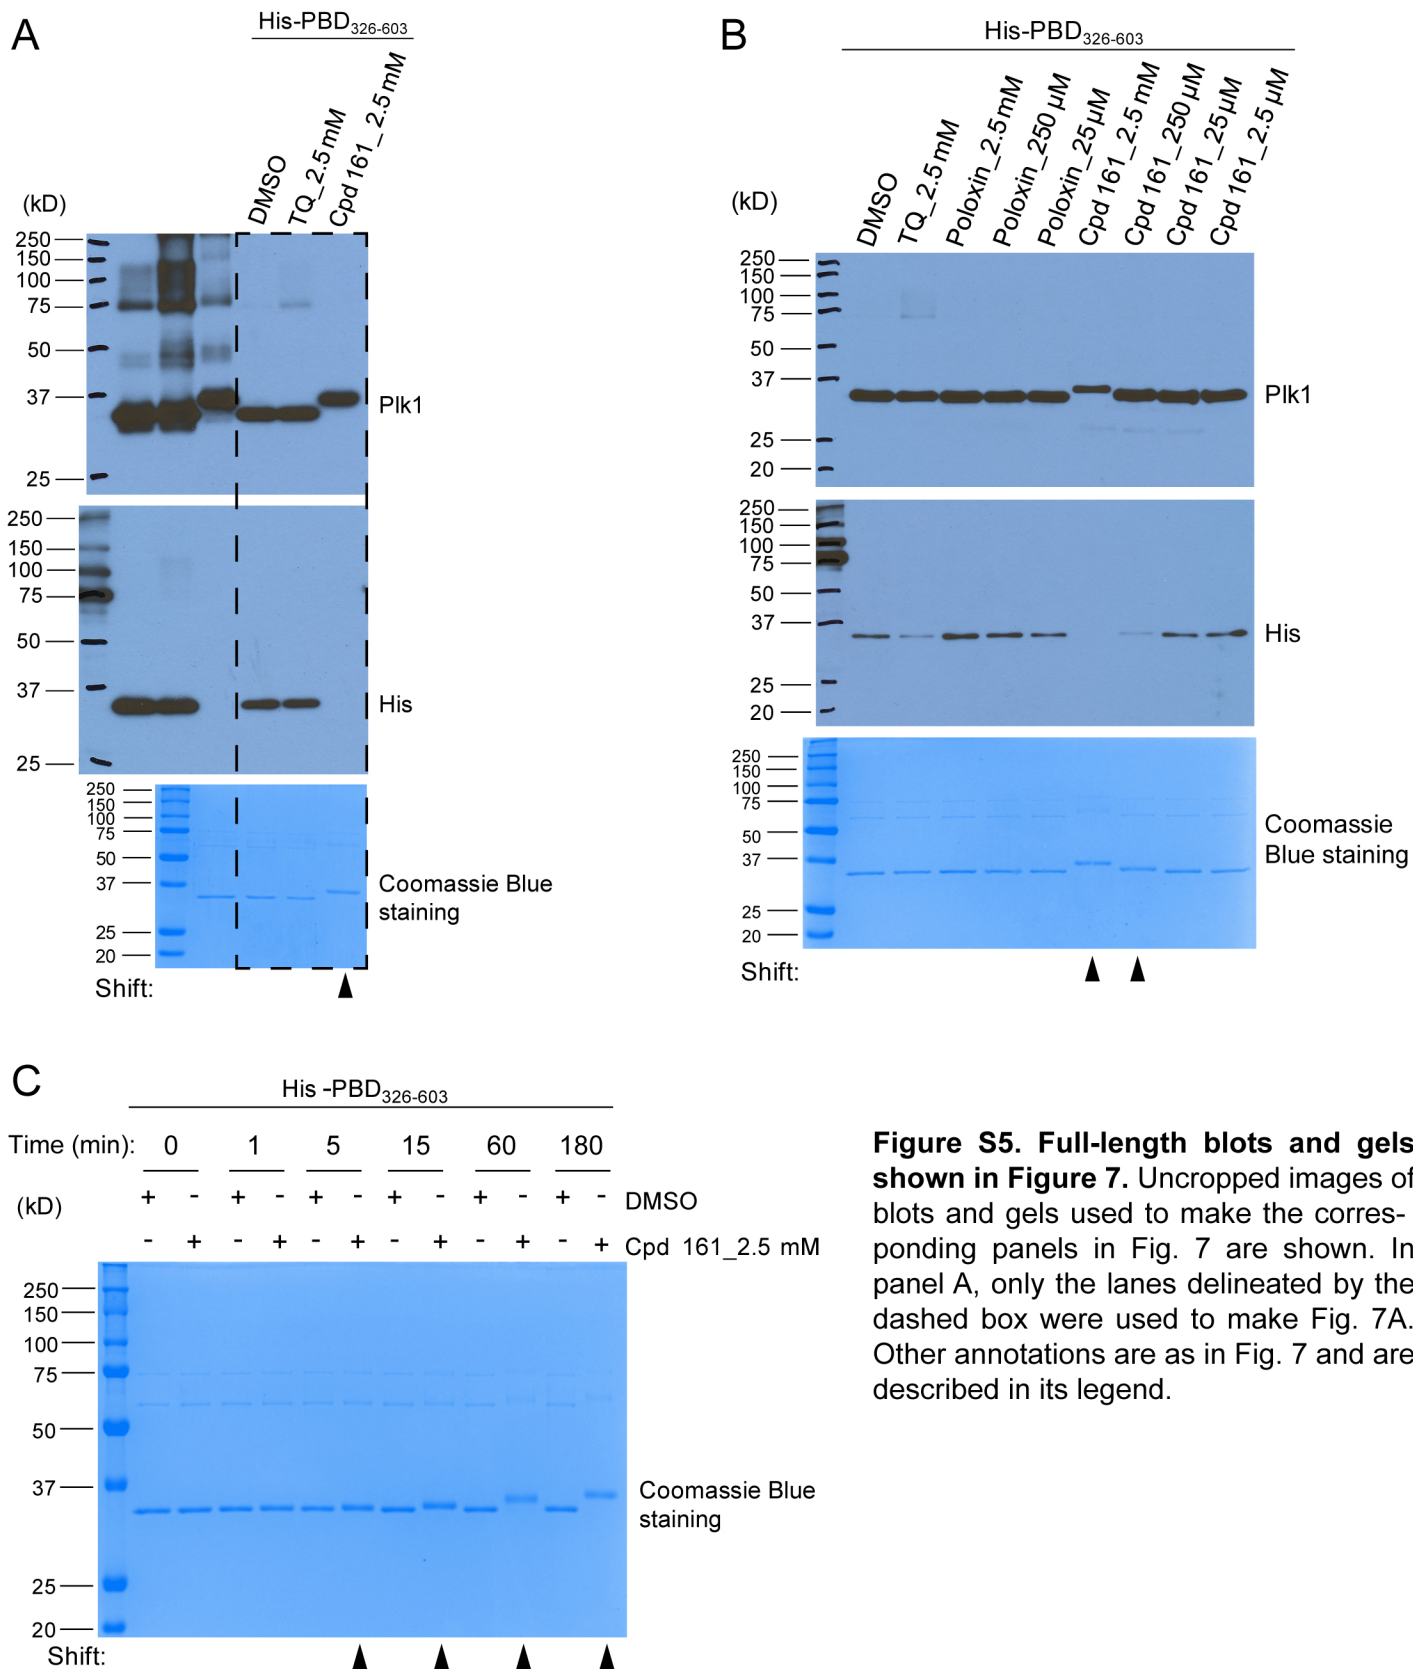

**Figure S5. Full-length blots and gels shown in Figure 7.** Uncropped images of blots and gels used to make the corresponding panels in Fig. 7 are shown. In panel A, only the lanes delineated by the dashed box were used to make Fig. 7A. Other annotations are as in Fig. 7 and are described in its legend.

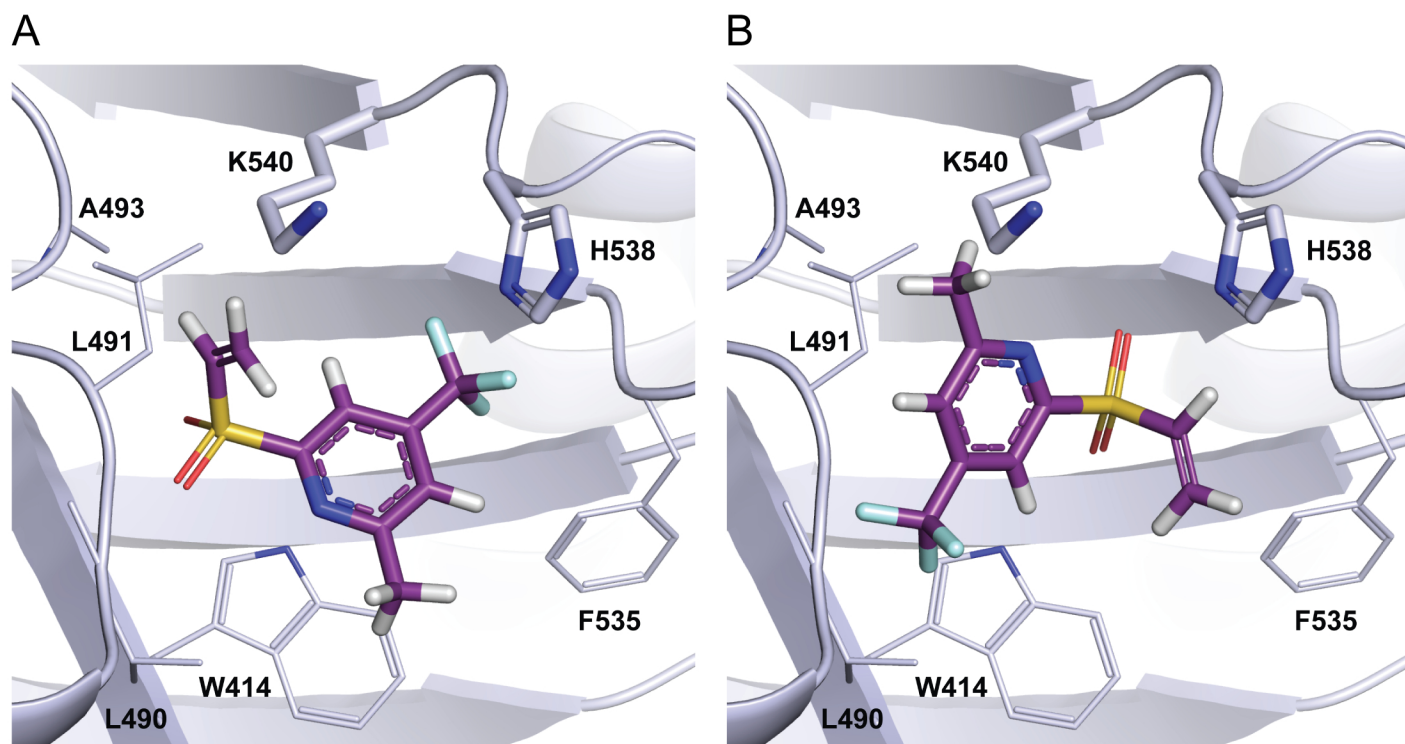

**Figure S6. Putative binding modes of Cpd 161 on the PBD.** Molecular docking predicts that the preferred binding site of Cpd 161 on the PBD (PDB entry 1UMW) is its phosphopeptide binding pocket (where W414, H538 and K540 are crucial residues). Two alternative poses of Cpd 161, with non-significant difference in their respective estimated docking score, are shown (A and B). PBD is shown as cartoon and sticks, carbon and nitrogen atoms are in grey and blue color, respectively. Cpd 161 is shown as sticks, colored as follows: purple: carbon atoms, blue: nitrogen, yellow: sulfur; red: oxygen, light blue: fluorine, white: hydrogen.

**Table S1. Raw data from the LUMIER assay (Figure 3).** Luminescence on beads are presented for each of the 4 plates (one per tab). DMSO was included as an internal control on each plate (first and last column, in gray) and all compounds were tested in duplicate (side by side) on a same plate. Due to the time needed for the readings between columns in this assay, we found that counts systematically increased from left to right in each plate, as the enzymatic reaction progressed. To circumvent this problem, we analyzed the data in the following way. The mean luminescence value for each compound was divided by the maximum mean value of each column of compounds (in orange, normalized to 1). Resulting values are expressed as Relative Luminescence Units (RLU). The data should be viewed as rough indications of activity in co-IP.

PLATE 1

BEADS

| Column #1     | Column #2      | Column #3 | Column #4         | Column #5 | Column #6         | Column #7 | Column #8         | Column #9 | Column #10      |
|---------------|----------------|-----------|-------------------|-----------|-------------------|-----------|-------------------|-----------|-----------------|
| DMSO: 390,066 | Cpd 1: 15,076  | 9,654     | Cpd 9: 74,244     | 87,986    | Cpd 17: 886,164   | 1,022,272 | Cpd 25: 1,428,771 | 1,306,371 | DMSO: 2,585,917 |
| DMSO: 453,836 | Cpd 2: 159,976 | 152,582   | Cpd 10: 1,132,468 | 1,141,840 | Cpd 18: 48,113    | 66,908    | Cpd 26: 1,841,391 | 1,130,286 | DMSO: 2,910,820 |
| DMSO: 423,655 | Cpd 3: 669,840 | 695,778   | Cpd 11: 374,254   | 328,854   | Cpd 19: 18,046    | 28,452    | Cpd 27: 42,504    | 39,770    | DMSO: 2,967,920 |
| DMSO: 359,412 | Cpd 4: 459,296 | 589,011   | Cpd 12: 641,210   | 771,760   | Cpd 20: 1,032,000 | 1,384,114 | Cpd 28: 470,276   | 374,830   | DMSO: 2,979,922 |
| DMSO: 401,916 | Cpd 5: 723,890 | 358,615   | Cpd 13: 38,822    | 51,866    | Cpd 21: 728,406   | 1,095,957 | Cpd 29: 2,579,044 | 2,456,177 | DMSO: 2,864,320 |
| DMSO: 425,204 | Cpd 6: 221,644 | 208,600   | Cpd 14: 1,055,362 | 1,184,868 | Cpd 22: 1,037,198 | 1,434,797 | Cpd 30: 1,964,228 | 1,946,733 | DMSO: 2,482,486 |
| DMSO: 398,126 | Cpd 7: 422,540 | 537,002   | Cpd 15: 18,060    | 19,824    | Cpd 23: 75,154    | 249,262   | Cpd 31: 1,563,040 | 639,044   | DMSO: 2,315,537 |
| DMSO: 57,336  | Cpd 8: 114,916 | 163,133   | Cpd 16: 21,904    | 28,648    | Cpd 24: 315,073   | 464,828   | Cpd 32: 26,500    | 26,938    | DMSO: 217,502   |

|                  |           |
|------------------|-----------|
| Average-Beads    |           |
| DMSO- Column #1  | 407,459   |
| DMSO- Column #10 | 2,729,560 |

| Relative Luminescence Unit |       |
|----------------------------|-------|
| DMSO                       | 0.907 |
| Cpd 1                      | 0.018 |
| Cpd 2                      | 0.229 |
| Cpd 3                      | 1.000 |
| Cpd 4                      | 0.768 |
| Cpd 5                      | 0.793 |
| Cpd 6                      | 0.315 |
| Cpd 7                      | 0.703 |
| Cpd 8                      | 0.204 |
| Cpd 9                      | 0.071 |
| Cpd 10                     | 1.000 |
| Cpd 11                     | 0.309 |
| Cpd 12                     | 0.621 |
| Cpd 13                     | 0.040 |
| Cpd 14                     | 0.985 |
| Cpd 15                     | 0.017 |
| Cpd 16                     | 0.022 |
| Cpd 17                     | 0.772 |
| Cpd 18                     | 0.047 |
| Cpd 19                     | 0.019 |
| Cpd 20                     | 0.977 |
| Cpd 21                     | 0.738 |
| Cpd 22                     | 1.000 |
| Cpd 23                     | 0.131 |
| Cpd 24                     | 0.315 |
| Cpd 25                     | 0.543 |
| Cpd 26                     | 0.590 |
| Cpd 27                     | 0.016 |
| Cpd 28                     | 0.168 |
| Cpd 29                     | 1.000 |
| Cpd 30                     | 0.777 |
| Cpd 31                     | 0.437 |
| Cpd 32                     | 0.011 |

| DMSO | Column #1 | Column #10 | Average |
|------|-----------|------------|---------|
|      | 0.859     | 0.868      |         |
|      | 1.000     | 0.977      |         |
|      | 0.933     | 0.996      |         |
|      | 0.792     | 1.000      |         |
|      | 0.886     | 0.961      |         |
|      | 0.937     | 0.833      |         |
|      | 0.877     | 0.777      | 0.907   |



BEADS

|       | Column #1 | Column #2       | Column #3 | Column #4         | Column #5 | Column #6         | Column #7 | Column #8         | Column #9 | Column #10      |
|-------|-----------|-----------------|-----------|-------------------|-----------|-------------------|-----------|-------------------|-----------|-----------------|
| DMSO: | 467,370   | Cpd 33: 681,071 | 421,712   | Cpd 41: 44,182    | 81,310    | Cpd 49: 1,167,230 | 1,294,606 | Cpd 57: 40,968    | 73,000    | DMSO: 1,701,762 |
| DMSO: | 582,677   | Cpd 34: 428,644 | 568,092   | Cpd 42: 863,290   | 1,410,060 | Cpd 50: 1,045,308 | 927,518   | Cpd 58: 3,263,326 | 3,402,838 | DMSO: 1,696,280 |
| DMSO: | 521,296   | Cpd 35: 979,956 | 1,207,571 | Cpd 43: 1,101,437 | 1,094,104 | Cpd 51: 939,792   | 902,486   | Cpd 59: 2,047,466 | 2,427,149 | DMSO: 2,104,498 |
| DMSO: | 568,680   | Cpd 36: 76,196  | 88,128    | Cpd 44: 804,820   | 998,832   | Cpd 52: 837,456   | 1,133,424 | Cpd 60: 1,817,867 | 2,478,250 | DMSO: 2,287,766 |
| DMSO: | 553,748   | Cpd 37: 665,926 | 1,047,022 | Cpd 45: 1,340,842 | 1,309,842 | Cpd 53: 556,422   | 586,142   | Cpd 61: 1,789,324 | 2,256,664 | DMSO: 2,730,653 |
| DMSO: | 467,094   | Cpd 38: 722,513 | 959,044   | Cpd 46: 584,340   | 619,608   | Cpd 54: 746,228   | 1,283,113 | Cpd 62: 1,444,410 | 2,073,600 | DMSO: 2,541,782 |
| DMSO: | 535,678   | Cpd 39: 66,264  | 109,924   | Cpd 47: 463,475   | 812,822   | Cpd 55: 587,900   | 1,095,266 | Cpd 63: 1,340,537 | 2,218,073 | DMSO: 2,516,589 |
|       | 258,198   | Cpd 40: 227,542 | 285,071   | Cpd 48: 2,760,910 | 2,724,993 | Cpd 56: 608,977   | 913,864   | Cpd 64: 858,840   | 1,249,824 | 990,406         |

Average-Beads

DMSO- Column #1 528,078

DMSO- Column #10 2,225,619

Relative Luminescence Unit

|        | Relative Luminescence Unit |
|--------|----------------------------|
| DMSO   | 0.861                      |
| Cpd 33 | 0.504                      |
| Cpd 34 | 0.456                      |
| Cpd 35 | 1.000                      |
| Cpd 36 | 0.075                      |
| Cpd 37 | 0.783                      |
| Cpd 38 | 0.769                      |
| Cpd 39 | 0.081                      |
| Cpd 40 | 0.234                      |
| Cpd 41 | 0.023                      |
| Cpd 42 | 0.414                      |
| Cpd 43 | 0.400                      |
| Cpd 44 | 0.329                      |
| Cpd 45 | 0.483                      |
| Cpd 46 | 0.219                      |
| Cpd 47 | 0.233                      |
| Cpd 48 | 1.000                      |
| Cpd 49 | 1.000                      |
| Cpd 50 | 0.801                      |
| Cpd 51 | 0.748                      |
| Cpd 52 | 0.801                      |
| Cpd 53 | 0.464                      |
| Cpd 54 | 0.824                      |
| Cpd 55 | 0.684                      |
| Cpd 56 | 0.619                      |
| Cpd 57 | 0.017                      |
| Cpd 58 | 1.000                      |
| Cpd 59 | 0.671                      |
| Cpd 60 | 0.644                      |
| Cpd 61 | 0.607                      |
| Cpd 62 | 0.528                      |
| Cpd 63 | 0.534                      |
| Cpd 64 | 0.316                      |

| DMSO | Column #1 | Column #10 | Average |
|------|-----------|------------|---------|
|      | 0.802     | 0.623      |         |
|      | 1.000     | 0.621      |         |
|      | 0.895     | 0.771      |         |
|      | 0.976     | 0.838      |         |
|      | 0.950     | 1.000      |         |
|      | 0.802     | 0.931      |         |
|      | 0.919     | 0.922      | 0.861   |

BEADS

|       | Column #1 | Column #2       | Column #3 | Column #4       | Column #5 | Column #6       | Column #7 | Column #8       | Column #9 | Column #10       | Column #11 |
|-------|-----------|-----------------|-----------|-----------------|-----------|-----------------|-----------|-----------------|-----------|------------------|------------|
| DMSO: | 149,068   | Cpd 65: 4,502   | 6,462     | Cpd 73: 449,800 | 511,712   | Cpd 81: 227,038 | 247,708   | Cpd 89: 325,044 | 362,996   | Cpd 97: 528,542  | 681,268    |
| DMSO: | 140,140   | Cpd 66: 175,566 | 226,524   | Cpd 74: 405,492 | 355,371   | Cpd 82: 311,754 | 318,770   | Cpd 90: 536,006 | 498,564   | Cpd 98: 492,874  | 816,915    |
| DMSO: | 129,470   | Cpd 67: 290,576 | 360,997   | Cpd 75: 424,156 | 532,396   | Cpd 83: 424,392 | 454,828   | Cpd 91: 593,357 | 451,615   | Cpd 99: 410,970  | 289,453    |
| DMSO: | 130,420   | Cpd 68: 109,900 | 138,380   | Cpd 76: 444,633 | 594,914   | Cpd 84: 356,900 | 434,891   | Cpd 92: 600,246 | 595,235   | Cpd 100: 689,748 | 497,264    |
| DMSO: | 116,602   | Cpd 69: 232,744 | 331,226   | Cpd 77: 477,280 | 570,393   | Cpd 85: 454,990 | 421,466   | Cpd 93: 565,666 | 439,402   | DMSO: 629,410    | 609,232    |
| DMSO: | 128,070   | Cpd 70: 265,246 | 317,708   | Cpd 78: 287,174 | 461,071   | Cpd 86: 299,360 | 479,828   | Cpd 94: 521,318 | 506,278   | DMSO: 613,608    | 387,714    |
| DMSO: | 115,826   | Cpd 71: 165,275 | 238,710   | Cpd 79: 295,998 | 343,468   | Cpd 87: 266,608 | 435,000   | Cpd 95: 407,448 | 414,768   | DMSO: 413,108    | 334,016    |
|       | 12,484    | Cpd 72: 64,794  | 178,690   | Cpd 80: 121,111 | 185,792   | Cpd 88: 170,771 | 302,793   | Cpd 96: 146,777 | 357,380   | DMSO: 321,470    | 67,770     |

Average-Beads

DMSO- Column #1 129,942

DMSO- Columns #10-11 472,651

Relative Luminescence Unit

| DMSO    | Relative Luminescence Unit |
|---------|----------------------------|
| DMSO    | 0.816                      |
| Cpd 65  | 5.482                      |
| Cpd 66  | 201,045                    |
| Cpd 67  | 325,787                    |
| Cpd 68  | 124,140                    |
| Cpd 69  | 281,985                    |
| Cpd 70  | 291,477                    |
| Cpd 71  | 201,993                    |
| Cpd 72  | 121,742                    |
| Cpd 73  | 480,756                    |
| Cpd 74  | 380,432                    |
| Cpd 75  | 478,276                    |
| Cpd 76  | 519,774                    |
| Cpd 77  | 523,837                    |
| Cpd 78  | 374,123                    |
| Cpd 79  | 319,733                    |
| Cpd 80  | 153,452                    |
| Cpd 81  | 237,373                    |
| Cpd 82  | 315,262                    |
| Cpd 83  | 439,610                    |
| Cpd 84  | 395,896                    |
| Cpd 85  | 438,228                    |
| Cpd 86  | 389,594                    |
| Cpd 87  | 350,804                    |
| Cpd 88  | 236,782                    |
| Cpd 89  | 344,020                    |
| Cpd 90  | 517,285                    |
| Cpd 91  | 522,486                    |
| Cpd 92  | 597,741                    |
| Cpd 93  | 502,534                    |
| Cpd 94  | 513,798                    |
| Cpd 95  | 411,108                    |
| Cpd 96  | 252,079                    |
| Cpd 97  | 604,905                    |
| Cpd 98  | 654,895                    |
| Cpd 99  | 350,212                    |
| Cpd 100 | 593,506                    |

| DMSO | Column #1 | Columns #10-11 | Average |
|------|-----------|----------------|---------|
|      | 1.000     | 1.000          |         |
|      | 0.940     | 0.975          |         |
|      | 0.869     | 0.656          |         |
|      | 0.875     | 0.511          |         |
|      | 0.782     | 1.000          |         |
|      | 0.859     | 0.636          |         |
|      | 0.777     | 0.548          | 0.816   |

BEADS

|       | Column #1 | Column #2        | Column #3 | Column #4        | Column #5 | Column #6        | Column #7 | Column #8          | Column #9 | Column #12      |
|-------|-----------|------------------|-----------|------------------|-----------|------------------|-----------|--------------------|-----------|-----------------|
| DMSO: | 250,062   | Cpd 101: 377,313 | 353,900   | Cpd 109: 275,224 | 381,837   | Cpd 117: 370,854 | 531,853   | TQ: 221,826        | 304,556   | DMSO: 1,595,057 |
| DMSO: | 259,951   | Cpd 102: 412,144 | 595,808   | Cpd 110: 555,674 | 535,226   | Cpd 118: 757,471 | 832,352   | Poloxin: 1,325,160 | 1,298,916 | DMSO: 1,442,344 |
| DMSO: | 228,044   | Cpd 103: 400,971 | 520,906   | Cpd 111: 96,962  | 94,360    | Cpd 119: 801,555 | 773,018   |                    |           | DMSO: 1,414,942 |
| DMSO: | 286,524   | Cpd 104: 425,618 | 630,168   | Cpd 112: 702,052 | 676,557   | Cpd 120: 888,117 | 828,624   |                    |           | DMSO: 1,095,800 |
| DMSO: | 185,230   | Cpd 105: 415,974 | 547,728   | Cpd 113: 690,682 | 745,816   | Cpd 121: 783,868 | 856,250   | Cpd 122: 909,984   | 1,127,164 | DMSO: 1,122,604 |
| DMSO: | 207,044   | Cpd 106: 316,228 | 486,338   | Cpd 114: 557,726 | 625,664   |                  |           |                    |           | DMSO: 1,067,646 |
| DMSO: | 216,178   | Cpd 107: 246,040 | 392,276   | Cpd 115: 364,440 | 560,460   | BI 2536: 47,611  | 56,678    |                    |           | DMSO: 877,613   |
| DMSO: | 107,904   | Cpd 108: 175,324 | 197,258   | Cpd 116: 248,798 | 364,698   | PPG: 290,044     | 312,040   |                    |           | DMSO: 359,786   |

Average-Beads

DMSO- Column #1 233,290

DMSO- Column #12 1,230,858

Relative Luminescence Unit

|         | Relative Luminescence Unit |
|---------|----------------------------|
| DMSO    | 0.793                      |
| Cpd 101 | 0.693                      |
| Cpd 102 | 0.955                      |
| Cpd 103 | 0.873                      |
| Cpd 104 | 1.000                      |
| Cpd 105 | 0.913                      |
| Cpd 106 | 0.760                      |
| Cpd 107 | 0.605                      |
| Cpd 108 | 0.353                      |
| Cpd 109 | 0.457                      |
| Cpd 110 | 0.759                      |
| Cpd 111 | 0.133                      |
| Cpd 112 | 0.960                      |
| Cpd 113 | 1.000                      |
| Cpd 114 | 0.824                      |
| Cpd 115 | 0.644                      |
| Cpd 116 | 0.427                      |
| Cpd 117 | 0.526                      |
| Cpd 118 | 0.926                      |
| Cpd 119 | 0.917                      |
| Cpd 120 | 1.000                      |
| Cpd 121 | 0.955                      |
| BI 2536 | 0.061                      |
| PPG     | 0.351                      |
| TQ      | 0.201                      |
| Poloxin | 1.000                      |
| Cpd 122 | 0.776                      |

| DMSO | Column #1 | Column #12 | Average |
|------|-----------|------------|---------|
|      | 0.873     | 1.000      |         |
|      | 0.907     | 0.904      |         |
|      | 0.796     | 0.887      |         |
|      | 1.000     | 0.687      |         |
|      | 0.646     | 0.704      |         |
|      | 0.723     | 0.669      |         |
|      | 0.754     | 0.550      | 0.793   |

Table S2. BRET, mitotic index and co-IP results compilation for the 122 BRET hits.

| Cpd # | ID        | Batch | Supplier  | Supplier ID | Primary screen<br>Plk1-Map<br>(stable) |                     | Primary screen<br>CRAF-BRAF<br>(transient) |                     | Confirmation<br>Plk1-Map (stable) |                     | Confirmation<br>Plk1-Map (transient) |                     | Confirmation<br>CRAF-BRAF<br>(transient) |                     | Mitotic index   |                     | Co-IP                |
|-------|-----------|-------|-----------|-------------|----------------------------------------|---------------------|--------------------------------------------|---------------------|-----------------------------------|---------------------|--------------------------------------|---------------------|------------------------------------------|---------------------|-----------------|---------------------|----------------------|
|       |           |       |           |             | %<br>Inhibition                        | %<br>Quench<br>RLuc | %<br>Inhibition                            | %<br>Quench<br>RLuc | %<br>Inhibition                   | %<br>Quench<br>RLuc | %<br>Inhibition                      | %<br>Quench<br>RLuc | %<br>Inhibition                          | %<br>Quench<br>RLuc | %<br>Inhibition | %<br>Quench<br>RLuc | Mitotic<br>index (%) |
| 1     | UM0107177 | 01    | MAYBRIDGE | AW 00482    | 50.82                                  | 79.13               | 21.44                                      | 80.08               | 66.71                             | 81.02               | 63.61                                | 69.40               | -24.74                                   | 72.14               | 1.59            | 668                 | 0.018                |
| 2     | UM0107221 | 01    | MAYBRIDGE | AW 00592    | 55.07                                  | 85.96               | 31.45                                      | 75.12               | 35.46                             | 90.44               | -34.13                               | 73.50               | 0.35                                     | 69.42               | 5.64            | 1121                | 0.229                |
| 3     | UM0107266 | 01    | MAYBRIDGE | AW 01093    | 53.30                                  | 85.61               | 61.48                                      | 88.22               | 30.16                             | 93.58               | -12.13                               | 89.74               | 2.18                                     | 86.31               | 5.16            | 1241                | 1.000                |
| 4     | UM0107457 | 01    | MAYBRIDGE | BTB 01468   | 61.37                                  | 74.20               | 6.39                                       | 64.29               | 37.02                             | 71.62               | 3.89                                 | 51.50               | -23.24                                   | 41.54               | 3.78            | 1030                | 0.768                |
| 5     | UM0107465 | 01    | MAYBRIDGE | BTB 01397   | 65.21                                  | 59.62               | 23.57                                      | 38.70               | 45.45                             | 61.07               | 17.66                                | -13.30              | -0.79                                    | 23.13               | 0.41            | 638                 | 0.793                |
| 6     | UM0107466 | 01    | MAYBRIDGE | BTB 01470   | 62.68                                  | 87.76               | 7.51                                       | 84.96               | 32.04                             | 89.40               | 5.59                                 | 80.38               | -33.37                                   | 75.46               | 2.84            | 1005                | 0.315                |
| 7     | UM0107535 | 01    | MAYBRIDGE | BTB 02075   | 58.30                                  | 64.35               | -7.01                                      | 66.17               | 26.54                             | 47.47               | -9.57                                | 16.31               | -35.15                                   | 6.23                | 4.37            | 811                 | 0.703                |
| 8     | UM0108212 | 01    | MAYBRIDGE | BTB 04098   | 54.13                                  | 66.53               | 13.33                                      | 68.83               | 25.74                             | 60.04               | 7.94                                 | 28.16               | -18.98                                   | 25.97               | 2.89            | 1083                | 0.204                |
| 9     | UM0108871 | 01    | MAYBRIDGE | BTB 04426   | 56.34                                  | 77.93               | -52.46                                     | 69.98               | 49.28                             | 70.98               | 60.77                                | 58.61               | 9.16                                     | 81.03               | 0.17            | 592                 | 0.071                |
| 10    | UM0024677 | 03    | MAYBRIDGE | BTB 04957   | 67.60                                  | 93.78               | 36.31                                      | 85.60               | 42.67                             | 93.83               | -14.46                               | 73.44               | -11.38                                   | 63.73               | 4.31            | 1024                | 1.000                |
| 11    | UM0111426 | 01    | MAYBRIDGE | BTB 06019   | 46.60                                  | 76.68               | 1.34                                       | 48.60               | 29.73                             | 77.70               | -13.92                               | 40.97               | -10.42                                   | 53.70               | 7.54            | 910                 | 0.309                |
| 12    | UM0112103 | 01    | MAYBRIDGE | BTB 06776   | 68.25                                  | 89.25               | 38.71                                      | 86.66               | 20.39                             | 81.39               | 7.11                                 | 70.27               | -12.51                                   | 63.67               | 4.08            | 1178                | 0.621                |
| 13    | UM0112687 | 01    | MAYBRIDGE | BTB 07155   | 76.83                                  | 85.35               | 51.15                                      | 84.05               | 61.45                             | 79.50               | 68.19                                | 66.43               | 18.66                                    | 83.95               | 3.70            | 612                 | 0.040                |
| 14    | UM0113547 | 01    | MAYBRIDGE | BTB 08799   | 67.58                                  | 86.85               | 39.91                                      | 80.51               | 41.26                             | 89.74               | -38.11                               | 59.00               | -14.66                                   | 39.49               | 5.24            | 1125                | 0.985                |
| 15    | UM0113559 | 01    | MAYBRIDGE | BTB 08960   | 67.91                                  | 84.93               | 31.50                                      | 81.13               | 41.55                             | 78.03               | 53.01                                | 72.97               | -4.59                                    | 86.14               | 0.81            | 823                 | 0.017                |
| 16    | UM0113574 | 01    | MAYBRIDGE | BTB 09085   | 67.34                                  | 86.24               | 52.83                                      | 88.39               | 30.79                             | 81.37               | 30.06                                | 74.57               | 0.37                                     | 80.17               | 15.73           | 789                 | 0.022                |
| 17    | UM0114221 | 01    | MAYBRIDGE | CD 03862    | 64.09                                  | 91.79               | 17.43                                      | 85.48               | 62.50                             | 91.30               | 3.77                                 | 83.77               | -44.82                                   | 79.36               | 9.70            | 843                 | 0.772                |
| 18    | UM0114440 | 01    | MAYBRIDGE | CD 08589    | 45.55                                  | 78.56               | 8.26                                       | 87.41               | 42.59                             | 81.79               | 60.17                                | 69.60               | 7.13                                     | 87.60               | 0.54            | 458                 | 0.047                |
| 19    | UM0044124 | 02    | MAYBRIDGE | DSHS 00690  | 77.53                                  | 88.69               | 42.12                                      | 87.63               | 36.81                             | 92.52               | 10.92                                | 83.45               | -26.61                                   | 81.39               | 0.57            | 585                 | 0.019                |
| 20    | UM0114956 | 01    | MAYBRIDGE | DSHS 00902  | 46.34                                  | 87.87               | 54.93                                      | 89.27               | 21.53                             | 91.98               | -17.19                               | 86.96               | -22.73                                   | 82.72               | 5.77            | 1281                | 0.977                |
| 21    | UM0114962 | 01    | MAYBRIDGE | DSHS 00691  | 45.76                                  | 78.45               | 23.02                                      | 53.92               | 23.26                             | 69.35               | -13.00                               | 46.29               | -15.44                                   | 29.17               | 5.77            | 1201                | 0.738                |
| 22    | UM0115060 | 01    | MAYBRIDGE | GK 00932    | 57.37                                  | 84.54               | 33.24                                      | 85.72               | 41.81                             | 95.30               | -1.29                                | 89.97               | -2.53                                    | 87.37               | 4.14            | 1226                | 1.000                |
| 23    | UM0044370 | 02    | MAYBRIDGE | GK 01179    | 78.41                                  | 82.19               | -37.15                                     | 81.61               | 48.10                             | 81.45               | 64.99                                | 70.40               | -65.02                                   | 83.59               | 2.63            | 797                 | 0.131                |
| 24    | UM0115252 | 01    | MAYBRIDGE | GK 02719    | 68.10                                  | 88.13               | 54.62                                      | 87.02               | 36.96                             | 93.36               | 5.68                                 | 86.41               | 5.36                                     | 88.72               | 5.59            | 1240                | 0.315                |
| 25    | UM0115281 | 01    | MAYBRIDGE | GK 03147    | 45.23                                  | 89.37               | 53.14                                      | 89.82               | 26.07                             | 94.57               | -8.10                                | 92.30               | -8.57                                    | 88.81               | 4.78            | 1116                | 0.543                |
| 26    | UM0115294 | 01    | MAYBRIDGE | GK 03068    | 52.76                                  | 87.32               | 36.28                                      | 78.36               | 40.41                             | 87.86               | -6.40                                | 79.33               | -8.86                                    | 73.75               | 3.92            | 1083                | 0.590                |
| 27    | UM0115297 | 01    | MAYBRIDGE | GK 03183    | 80.81                                  | 80.09               | 31.44                                      | 87.95               | 39.21                             | 79.07               | 68.50                                | 70.64               | 18.98                                    | 87.05               | 2.84            | 705                 | 0.016                |
| 28    | UM0044649 | 02    | MAYBRIDGE | HAN 00116   | 45.62                                  | 78.12               | 9.04                                       | 88.52               | 50.48                             | 80.87               | 64.88                                | 70.41               | 9.73                                     | 87.46               | 2.87            | 764                 | 0.168                |
| 29    | UM0115430 | 01    | MAYBRIDGE | HAN 00410   | 35.64                                  | 79.81               | 4.37                                       | 39.68               | 27.83                             | 77.47               | -13.59                               | 29.30               | -17.95                                   | 16.64               | 3.94            | 1057                | 1.000                |
| 30    | UM0115588 | 01    | MAYBRIDGE | HTS 01167   | 50.70                                  | 82.37               | 26.25                                      | 82.76               | 38.26                             | 90.34               | 0.67                                 | 84.37               | -16.55                                   | 76.63               | 4.46            | 1130                | 0.777                |
| 31    | UM0045020 | 02    | MAYBRIDGE | HTS 01731   | 59.16                                  | 85.22               | 35.04                                      | 72.15               | 53.24                             | 87.56               | -1.36                                | 67.10               | 8.69                                     | 55.48               | 5.27            | 1336                | 0.437                |
| 32    | UM0115695 | 01    | MAYBRIDGE | HTS 01716   | 82.98                                  | 78.54               | 52.78                                      | 85.20               | 32.39                             | 61.04               | 10.87                                | 55.86               | -15.05                                   | 34.17               | 6.85            | 1221                | 0.011                |
| 33    | UM0045568 | 02    | MAYBRIDGE | HTS 04586   | 46.30                                  | 21.41               | 9.33                                       | 66.80               | 25.44                             | 52.76               | 3.17                                 | 40.96               | -7.50                                    | 25.32               | 5.01            | 895                 | 0.504                |
| 34    | UM0116166 | 01    | MAYBRIDGE | HTS 05440   | 47.36                                  | 37.79               | 35.79                                      | 59.50               | 32.78                             | 64.09               | 9.76                                 | 34.37               | 4.03                                     | 13.92               | 5.87            | 1113                | 0.456                |
| 35    | UM0116479 | 01    | MAYBRIDGE | HTS 07461   | 47.28                                  | 41.69               | 13.69                                      | 17.06               | 33.04                             | 51.36               | -2.19                                | -5.46               | 4.61                                     | -12.42              | 6.35            | 1023                | 1.000                |
| 36    | UM0116537 | 01    | MAYBRIDGE | HTS 07564   | 51.44                                  | 43.67               | 14.13                                      | 58.96               | 38.28                             | 47.30               | 52.07                                | 8.81                | 6.72                                     | 33.27               | 0.04            | 812                 | 0.075                |
| 37    | UM0046711 | 02    | MAYBRIDGE | HTS 11170   | 45.24                                  | 80.82               | 30.49                                      | 82.80               | 26.10                             | 87.33               | -14.06                               | 77.84               | -17.55                                   | 62.37               | 5.51            | 1278                | 0.783                |
| 38    | UM0117516 | 01    | MAYBRIDGE | JFD 02414   | 51.01                                  | 63.14               | 12.78                                      | 19.29               | 43.35                             | 69.42               | 0.03                                 | 6.66                | 3.22                                     | 2.00                | 4.51            | 1105                | 0.769                |
| 39    | UM0117931 | 01    | MAYBRIDGE | KM 01532    | 46.92                                  | 58.25               | 38.21                                      | 68.10               | 28.92                             | 72.06               | 39.04                                | 13.68               | -28.02                                   | 51.27               | 1.85            | 915                 | 0.081                |
| 40    | UM0107759 | 01    | MAYBRIDGE | KM 03640    | 57.91                                  | 59.70               | 3.04                                       | 65.18               | 33.00                             | 64.89               | 28.30                                | 40.55               | 15.17                                    | 70.46               | 0.76            | 711                 | 0.234                |
| 41    | UM0107915 | 01    | MAYBRIDGE | KM 05478    | 48.25                                  | 76.91               | 9.15                                       | 82.74               | 22.85                             | 91.45               | -1.55                                | 83.71               | -0.82                                    | 89.16               | 0.65            | 752                 | 0.023                |
| 42    | UM0107958 | 01    | MAYBRIDGE | KM 05637    | 46.57                                  | 80.72               | 33.05                                      | 84.16               | 25.51                             | 75.79               | -14.59                               | 37.29               | -5.11                                    | 13.72               | 4.64            | 1146                | 0.414                |
| 43    | UM0109122 | 01    | MAYBRIDGE | NRB 04070   | 54.41                                  | 82.81               | 6.29                                       | 68.33               | 29.95                             | 84.93               | 35.79                                | 79.11               | 10.00                                    | 84.92               | 0.38            | 961                 | 0.400                |
| 44    | UM0050240 | 02    | MAYBRIDGE | NRB 04635   | 46.80                                  | 65.81               | 27.75                                      | 81.91               | 31.30                             | 73.89               | 46.34                                | 65.89               | 4.73                                     | 75.24               | 6.66            | 844                 | 0.329                |

|       |           |       |            |                 | Primary screen<br>Plk1-Map<br>(stable) |                     | Primary screen<br>CRAF-BRAF<br>(transient) |                     | Confirmation<br>Plk1-Map (stable) |                     | Confirmation<br>Plk1-Map (transient) |                     | Confirmation<br>CRAF-BRAF<br>(transient) |                     | Mitotic index        |                            | Co-IP                                            |
|-------|-----------|-------|------------|-----------------|----------------------------------------|---------------------|--------------------------------------------|---------------------|-----------------------------------|---------------------|--------------------------------------|---------------------|------------------------------------------|---------------------|----------------------|----------------------------|--------------------------------------------------|
| Cpd # | ID        | Batch | Supplier   | Supplier ID     | %<br>Inhibition                        | %<br>Quench<br>RLuc | %<br>Inhibition                            | %<br>Quench<br>RLuc | %<br>Inhibition                   | %<br>Quench<br>RLuc | %<br>Inhibition                      | %<br>Quench<br>RLuc | %<br>Inhibition                          | %<br>Quench<br>RLuc | Mitotic<br>index (%) | Nb of<br>analyzed<br>cells | Values relative<br>to top in plate<br>column = 1 |
| 45    | UM0110305 | 01    | MAYBRIDGE  | RH 01618        | 45.20                                  | 71.08               | 1.10                                       | 51.49               | 33.67                             | 85.08               | -30.22                               | 54.24               | -9.24                                    | 31.93               | 5.38                 | 1008                       | 0.483                                            |
| 46    | UM0110531 | 01    | MAYBRIDGE  | RJC 01628       | 53.18                                  | 82.37               | 16.40                                      | 63.54               | 30.35                             | 91.04               | -29.25                               | 72.57               | 19.45                                    | 66.12               | 29.44                | 831                        | 0.219                                            |
| 47    | UM0111224 | 01    | MAYBRIDGE  | S 04076         | 45.29                                  | 83.95               | 5.83                                       | 80.16               | 25.06                             | 89.54               | -34.97                               | 71.30               | 7.01                                     | 59.13               | 5.81                 | 1150                       | 0.233                                            |
| 48    | UM0111382 | 01    | MAYBRIDGE  | S 09528         | 64.65                                  | 53.86               | -17.19                                     | 85.32               | 33.05                             | 76.00               | 66.76                                | 64.63               | -36.81                                   | 71.69               | 2.86                 | 844                        | 1.000                                            |
| 49    | UM0111558 | 01    | MAYBRIDGE  | S 12721         | 47.04                                  | 83.98               | 26.90                                      | 82.37               | 22.76                             | 94.87               | -25.39                               | 85.65               | -4.13                                    | 80.84               | 5.42                 | 1246                       | 1.000                                            |
| 50    | UM0053923 | 02    | MAYBRIDGE  | SEW 02094       | 50.27                                  | 81.17               | 30.34                                      | 74.95               | 21.62                             | 89.00               | -26.33                               | 68.27               | 4.23                                     | 62.33               | 4.49                 | 1043                       | 0.801                                            |
| 51    | UM0112278 | 01    | MAYBRIDGE  | SEW 04487       | 45.29                                  | 68.33               | 38.92                                      | 79.48               | 23.19                             | 82.72               | -21.49                               | 67.09               | -13.15                                   | 65.32               | 5.08                 | 1140                       | 0.748                                            |
| 52    | UM0054719 | 02    | MAYBRIDGE  | SEW 06560       | 51.80                                  | 71.42               | 33.34                                      | 75.79               | 34.00                             | 87.94               | -7.60                                | 68.31               | 1.45                                     | 68.36               | 5.54                 | 1251                       | 0.801                                            |
| 53    | UM0054792 | 02    | MAYBRIDGE  | SP 00278        | 73.92                                  | 65.68               | -13.36                                     | 70.12               | 60.53                             | 70.21               | 60.20                                | 19.84               | -23.26                                   | 57.92               | 0.25                 | 711                        | 0.464                                            |
| 54    | UM0112835 | 01    | MAYBRIDGE  | SP 01000        | 53.70                                  | 67.85               | 37.49                                      | 80.97               | 41.04                             | 90.19               | -32.83                               | 72.33               | -10.41                                   | 72.90               | 4.26                 | 1083                       | 0.824                                            |
| 55    | UM0112874 | 01    | MAYBRIDGE  | SP 00932        | 65.38                                  | 72.24               | 36.23                                      | 82.49               | 28.65                             | 80.09               | -12.63                               | 42.73               | 11.99                                    | 57.62               | 5.27                 | 1126                       | 0.684                                            |
| 56    | UM0112902 | 01    | MAYBRIDGE  | SP 01131        | 67.10                                  | 77.26               | 28.17                                      | 81.60               | 50.83                             | 90.14               | -16.36                               | 57.34               | 6.88                                     | 51.70               | 4.98                 | 1253                       | 0.619                                            |
| 57    | UM0113055 | 01    | MAYBRIDGE  | SPB 01974       | 53.19                                  | 68.79               | 4.09                                       | 89.46               | 50.51                             | 72.14               | 71.14                                | 50.57               | -10.70                                   | 69.51               | 0.54                 | 716                        | 0.017                                            |
| 58    | UM0092330 | 01    | SPECS      | AE-842/33004023 | 65.44                                  | 83.13               | 31.26                                      | 89.59               | 53.82                             | 91.81               | 30.67                                | 78.98               | -23.16                                   | 86.72               | 3.75                 | 918                        | 1.000                                            |
| 59    | UM0098743 | 01    | SPECS      | AH-487/14754106 | 45.99                                  | 44.75               | -7.85                                      | 49.56               | 29.09                             | 69.72               | -9.80                                | 25.20               | 4.44                                     | 18.13               | 5.75                 | 1110                       | 0.671                                            |
| 60    | UM0101058 | 01    | SPECS      | AK-968/13146122 | 35.23                                  | 63.07               | 11.13                                      | 67.69               | 32.12                             | 85.23               | -20.95                               | 61.21               | -6.53                                    | 54.44               | 5.92                 | 1170                       | 0.644                                            |
| 61    | UM0096778 | 01    | SPECS      | AG-690/11634009 | 34.79                                  | 55.41               | -3.90                                      | 28.94               | 28.84                             | 66.72               | -11.44                               | 10.58               | 5.94                                     | 8.20                | 5.04                 | 1218                       | 0.607                                            |
| 62    | UM0099861 | 01    | SPECS      | AK-778/40958947 | 57.06                                  | 92.90               | 34.60                                      | 89.55               | 25.31                             | 91.53               | -4.94                                | 88.74               | -31.50                                   | 86.36               | 8.40                 | 1202                       | 0.528                                            |
| 63    | UM0093537 | 01    | SPECS      | AF-399/40772847 | 55.30                                  | 85.95               | 14.36                                      | 72.59               | 22.43                             | 90.81               | -31.39                               | 74.12               | -6.96                                    | 70.12               | 6.28                 | 1310                       | 0.534                                            |
| 64    | UM0098333 | 01    | SPECS      | AG-690/40751449 | 54.01                                  | 89.49               | 23.13                                      | 74.11               | 26.54                             | 78.16               | -17.93                               | 44.43               | 16.60                                    | 30.91               | 5.57                 | 1198                       | 0.316                                            |
| 65    | UM0103856 | 01    | SPECS      | AM-814/41094541 | 61.32                                  | 62.29               | 18.29                                      | 63.96               | 36.24                             | 55.25               | 66.45                                | 5.21                | 9.99                                     | 52.39               | 1.27                 | 757                        | 0.017                                            |
| 66    | UM0097001 | 01    | SPECS      | AG-690/11972457 | 50.52                                  | 77.46               | 22.17                                      | 64.38               | 37.47                             | 87.78               | -38.28                               | 67.78               | 4.54                                     | 58.51               | 5.92                 | 1233                       | 0.617                                            |
| 67    | UM0074324 | 02    | SPECS      | AK-968/37055100 | 31.29                                  | 37.41               | 6.83                                       | 16.36               | 22.95                             | 61.79               | 1.09                                 | 8.90                | 10.69                                    | 2.61                | 4.67                 | 1193                       | 1.000                                            |
| 68    | UM0007091 | 02    | SPECS      | AK-968/11165178 | 57.54                                  | 82.61               | 17.83                                      | 79.56               | 28.10                             | 89.68               | 14.45                                | 80.27               | 5.89                                     | 81.72               | 4.61                 | 1032                       | 0.381                                            |
| 69    | UM0091821 | 01    | SPECS      | AA-768/34978021 | 77.38                                  | 86.93               | 18.32                                      | 72.42               | 49.85                             | 91.91               | -0.61                                | 62.73               | 7.18                                     | 67.88               | 30.13                | 831                        | 0.866                                            |
| 70    | UM0100032 | 01    | SPECS      | AK-918/36937003 | 46.12                                  | 46.18               | 0.06                                       | 56.69               | 22.36                             | 62.75               | 5.50                                 | 38.39               | -28.95                                   | 58.72               | 5.83                 | 1133                       | 0.895                                            |
| 71    | UM0007012 | 02    | SPECS      | AK-968/11164008 | 41.57                                  | 76.66               | 0.10                                       | 47.69               | 26.24                             | 76.59               | -2.74                                | 22.97               | -6.09                                    | 29.41               | 4.26                 | 1195                       | 0.620                                            |
| 72    | UM0092622 | 01    | SPECS      | AE-848/32013001 | 59.39                                  | 89.58               | 12.98                                      | 64.73               | 40.47                             | 93.63               | -13.07                               | 20.20               | 1.93                                     | 48.04               | 4.61                 | 1133                       | 0.374                                            |
| 73    | UM0094671 | 01    | SPECS      | AG-205/33681021 | 63.62                                  | 64.67               | 17.70                                      | 53.74               | 61.07                             | 86.87               | 14.84                                | 43.80               | 12.53                                    | 60.89               | 4.74                 | 1166                       | 0.918                                            |
| 74    | UM0012934 | 01    | CHEMBRIDGE | 5627239         | 57.14                                  | 79.85               | -17.08                                     | 62.42               | 46.92                             | 89.77               | 5.59                                 | 53.85               | 7.55                                     | 57.95               | 6.08                 | 1066                       | 0.726                                            |
| 75    | UM0018211 | 01    | CHEMBRIDGE | 6104940         | 33.13                                  | 63.27               | -20.12                                     | 46.85               | 24.23                             | 69.66               | 0.50                                 | 24.45               | -5.25                                    | 20.92               | 4.13                 | 1028                       | 0.913                                            |
| 76    | UM0021111 | 01    | CHEMBRIDGE | 6444619         | 36.23                                  | 86.67               | -25.66                                     | 71.84               | 28.13                             | 79.68               | 2.98                                 | 24.94               | 1.10                                     | 21.27               | 4.63                 | 1102                       | 0.992                                            |
| 77    | UM0028721 | 01    | CHEMBRIDGE | 7638598         | 34.94                                  | 70.82               | 11.65                                      | 66.48               | 23.10                             | 68.69               | 0.66                                 | 31.04               | -0.51                                    | 27.16               | 4.73                 | 1061                       | 1.000                                            |
| 78    | UM0030219 | 01    | CHEMBRIDGE | 7661641         | 38.19                                  | 81.82               | -6.39                                      | 47.50               | 20.02                             | 52.04               | 5.19                                 | -9.88               | -1.19                                    | -10.17              | 3.26                 | 1158                       | 0.714                                            |
| 79    | UM0031037 | 01    | CHEMBRIDGE | 7677876         | 30.97                                  | 85.21               | -33.90                                     | 85.58               | 33.17                             | 75.37               | 14.03                                | 16.72               | 0.90                                     | 17.29               | 4.67                 | 1033                       | 0.610                                            |
| 80    | UM0033912 | 01    | CHEMBRIDGE | 7730387         | 58.62                                  | 83.13               | -26.68                                     | 76.10               | 48.50                             | 88.73               | 6.61                                 | 51.14               | 10.29                                    | 60.54               | 4.08                 | 1079                       | 0.293                                            |
| 81    | UM0036576 | 01    | CHEMBRIDGE | 7783341         | 39.52                                  | 85.34               | -49.88                                     | 66.67               | 35.26                             | 82.85               | 1.40                                 | 43.11               | 2.04                                     | 36.38               | 4.88                 | 943                        | 0.540                                            |
| 82    | UM0037150 | 01    | CHEMBRIDGE | 7797334         | 32.75                                  | 91.18               | -7.30                                      | 87.22               | 20.83                             | 87.73               | -21.33                               | 68.55               | -4.05                                    | 66.89               | 5.46                 | 1099                       | 0.717                                            |
| 83    | UM0035177 | 01    | CHEMBRIDGE | 7748948         | 65.55                                  | 95.99               | 31.78                                      | 73.09               | 67.35                             | 91.06               | 2.84                                 | 47.17               | 8.72                                     | 47.08               | 5.53                 | 1249                       | 1.000                                            |
| 84    | UM0006319 | 01    | CHEMBRIDGE | 5332028         | 49.16                                  | 88.80               | 42.57                                      | 87.02               | 25.03                             | 87.25               | -3.78                                | 80.90               | -15.37                                   | 79.45               | 6.12                 | 906                        | 0.901                                            |
| 85    | UM0006445 | 01    | CHEMBRIDGE | 5335954         | 35.60                                  | 76.35               | -55.12                                     | 85.87               | 23.46                             | 82.55               | 0.97                                 | 72.99               | -1.99                                    | 73.05               | 5.48                 | 1057                       | 0.997                                            |
| 86    | UM0007481 | 01    | CHEMBRIDGE | 5356835         | 48.16                                  | 47.44               | -19.74                                     | 57.89               | 22.94                             | 62.97               | -0.99                                | 25.56               | -5.93                                    | 22.95               | 5.12                 | 1099                       | 0.886                                            |
| 87    | UM0021300 | 01    | CHEMBRIDGE | 6464887         | 61.67                                  | 64.02               | -29.49                                     | 82.11               | 25.43                             | 71.46               | -2.68                                | 11.01               | -5.72                                    | 28.44               | 4.16                 | 1175                       | 0.798                                            |
| 88    | UM0032114 | 01    | CHEMBRIDGE | 7693232         | 34.75                                  | 90.60               | -36.49                                     | 84.35               | 24.24                             | 91.70               | -6.13                                | 77.82               | -9.37                                    | 82.92               | 4.57                 | 1120                       | 0.539                                            |
| 89    | UM0024677 | 02    | MAYBRIDGE  | BTB 04957       | 65.89                                  | 83.32               | -2.21                                      | 60.82               | 37.03                             | 90.16               | 2.91                                 | 44.38               | 2.11                                     | 51.19               | 5.10                 | 1080                       | 0.576                                            |

| Cpd # | ID        | Batch | Supplier   | Supplier ID     | Primary screen<br>Plk1-Map<br>(stable) |                     | Primary screen<br>CRAF-BRAF<br>(transient) |                     | Confirmation<br>Plk1-Map (stable) |                     | Confirmation<br>Plk1-Map (transient) |                     | Confirmation<br>CRAF-BRAF<br>(transient) |                     | Mitotic index   |                     | Co-IP                |
|-------|-----------|-------|------------|-----------------|----------------------------------------|---------------------|--------------------------------------------|---------------------|-----------------------------------|---------------------|--------------------------------------|---------------------|------------------------------------------|---------------------|-----------------|---------------------|----------------------|
|       |           |       |            |                 | %<br>Inhibition                        | %<br>Quench<br>RLuc | %<br>Inhibition                            | %<br>Quench<br>RLuc | %<br>Inhibition                   | %<br>Quench<br>RLuc | %<br>Inhibition                      | %<br>Quench<br>RLuc | %<br>Inhibition                          | %<br>Quench<br>RLuc | %<br>Inhibition | %<br>Quench<br>RLuc | Mitotic<br>index (%) |
| 90    | UM0026675 | 01    | CHEMBRIDGE | 7573944         | 31.54                                  | 93.69               | -34.02                                     | 86.30               | 24.87                             | 84.92               | 1.54                                 | 72.23               | 16.47                                    | 76.14               | 4.73            | 994                 | 0.865                |
| 91    | UM0040880 | 01    | MAYBRIDGE  | BTB 02165       | 31.42                                  | 80.31               | -62.27                                     | 88.13               | 21.59                             | 87.71               | -6.44                                | 81.17               | -1.92                                    | 82.34               | 5.46            | 938                 | 0.874                |
| 92    | UM0024677 | 01    | CHEMBRIDGE | 7182303         | 31.73                                  | 89.49               | -2.91                                      | 71.76               | 37.27                             | 88.36               | -7.35                                | 35.36               | -4.79                                    | 40.97               | 5.01            | 1114                | 1.000                |
| 93    | UM0043471 | 01    | MAYBRIDGE  | CD 09636        | 45.16                                  | 88.06               | -19.74                                     | 80.17               | 26.62                             | 85.18               | -8.24                                | 58.20               | -2.23                                    | 66.84               | 5.09            | 1026                | 0.841                |
| 94    | UM0044029 | 01    | MAYBRIDGE  | DP 01660        | 51.69                                  | 94.69               | 3.78                                       | 88.15               | 44.21                             | 87.91               | 35.12                                | 87.25               | 17.09                                    | 86.44               | 4.83            | 1089                | 0.860                |
| 95    | UM0045661 | 01    | MAYBRIDGE  | HTS 05195       | 45.78                                  | 92.59               | 22.52                                      | 68.30               | 24.98                             | 86.69               | -10.29                               | 55.66               | 18.00                                    | 64.03               | 5.31            | 1028                | 0.688                |
| 96    | UM0046655 | 01    | MAYBRIDGE  | HTS 10845       | 59.02                                  | 55.37               | 10.66                                      | 4.08                | 20.78                             | 62.69               | 3.53                                 | -18.74              | 11.95                                    | -26.33              | 4.80            | 1011                | 0.422                |
| 97    | UM0046929 | 01    | MAYBRIDGE  | HTS 12603       | 46.44                                  | -15.66              | -4.09                                      | 7.76                | 27.48                             | 64.10               | 6.60                                 | -1.90               | 10.94                                    | -8.01               | 5.52            | 1064                | 0.924                |
| 98    | UM0048554 | 01    | MAYBRIDGE  | KM 04938        | 61.42                                  | 73.36               | 9.17                                       | 35.83               | 30.73                             | 72.21               | 11.50                                | -7.56               | 7.06                                     | 6.67                | 5.60            | 912                 | 1.000                |
| 99    | UM0053488 | 01    | MAYBRIDGE  | SCR 00880       | 64.82                                  | 96.93               | -6.51                                      | 86.09               | 43.59                             | 95.67               | -1.55                                | 69.68               | -0.16                                    | 73.58               | 4.14            | 1035                | 0.535                |
| 100   | UM0055888 | 01    | MAYBRIDGE  | SPB 06986       | 56.28                                  | 70.67               | -5.98                                      | 49.29               | 21.68                             | 81.71               | 36.75                                | 83.83               | 10.77                                    | 85.00               | 3.46            | 1091                | 0.906                |
| 101   | UM0057305 | 01    | CHEMBRIDGE | 7973027         | 58.20                                  | 71.17               | 11.87                                      | 24.48               | 25.59                             | 81.25               | -2.26                                | 5.22                | -1.25                                    | 8.14                | 4.90            | 1082                | 0.693                |
| 102   | UM0057777 | 01    | CHEMBRIDGE | 7994213         | 53.01                                  | 86.51               | -16.54                                     | 76.76               | 22.75                             | 89.27               | 1.44                                 | 29.97               | 0.02                                     | 26.31               | 5.04            | 1156                | 0.955                |
| 103   | UM0057973 | 01    | CHEMBRIDGE | 7998959         | 37.22                                  | 87.50               | -4.16                                      | 82.45               | 23.14                             | 87.15               | -4.15                                | 54.58               | 0.96                                     | 63.97               | 5.09            | 1269                | 0.873                |
| 104   | UM0057989 | 01    | CHEMBRIDGE | 7999397         | 39.98                                  | 76.07               | -14.54                                     | 44.82               | 21.84                             | 74.15               | 3.12                                 | 3.89                | 2.23                                     | 7.27                | 4.60            | 1136                | 1.000                |
| 105   | UM0061111 | 01    | CHEMBRIDGE | 9032660         | 34.88                                  | 91.43               | -17.93                                     | 73.39               | 23.41                             | 91.83               | -7.42                                | 66.08               | -3.58                                    | 70.37               | 4.26            | 1151                | 0.913                |
| 106   | UM0061877 | 01    | CHEMBRIDGE | 9037275         | 33.90                                  | 88.43               | 2.59                                       | 15.25               | 36.57                             | 82.59               | -5.15                                | 17.65               | 4.63                                     | 4.64                | 4.67            | 1038                | 0.760                |
| 107   | UM0063060 | 01    | CHEMBRIDGE | 9043703         | 35.84                                  | 92.37               | -35.90                                     | 89.70               | 23.41                             | 94.03               | -6.99                                | 88.59               | 3.94                                     | 89.06               | 5.67            | 1132                | 0.605                |
| 108   | UM0064980 | 01    | CHEMBRIDGE | 9053935         | 49.87                                  | 77.46               | 1.34                                       | 75.29               | 27.61                             | 91.79               | -7.08                                | 69.97               | 2.78                                     | 65.83               | 4.53            | 1115                | 0.353                |
| 109   | UM0065245 | 01    | CHEMBRIDGE | 9055626         | 30.40                                  | 48.25               | 0.23                                       | 45.69               | 21.21                             | 77.52               | -4.20                                | 43.98               | -1.50                                    | 40.13               | 4.24            | 1303                | 0.457                |
| 110   | UM0065246 | 01    | CHEMBRIDGE | 9055637         | 60.41                                  | 86.89               | 20.65                                      | 86.28               | 31.50                             | 92.21               | -16.97                               | 73.64               | 1.99                                     | 74.92               | 4.62            | 1078                | 0.759                |
| 111   | UM0067000 | 01    | CHEMBRIDGE | 5134355         | 57.76                                  | 73.12               | 25.91                                      | 66.49               | 36.70                             | 62.66               | 11.76                                | 35.42               | 17.99                                    | 39.64               | 4.74            | 1312                | 0.133                |
| 112   | UM0067184 | 01    | CHEMBRIDGE | 5144173         | 57.92                                  | 71.84               | 0.00                                       | 55.88               | 32.29                             | 74.81               | 7.79                                 | 10.94               | 5.72                                     | 32.74               | 5.62            | 1358                | 0.960                |
| 113   | UM0074300 | 01    | CHEMBRIDGE | 5676580         | 67.59                                  | 86.55               | 27.85                                      | 82.94               | 50.01                             | 93.10               | 15.89                                | 81.59               | 14.86                                    | 87.48               | 5.03            | 1266                | 1.000                |
| 114   | UM0126848 | 01    | UdeM       | UDM-000144      | 31.05                                  | 72.96               | 22.02                                      | 52.38               | 20.34                             | 72.77               | -4.60                                | 17.86               | -1.60                                    | 29.77               | 5.74            | 1089                | 0.824                |
| 115   | UM0127131 | 01    | UdeM       | UDM-000770      | 62.96                                  | 77.03               | 35.58                                      | 89.67               | 22.78                             | 80.34               | -12.42                               | 18.67               | 3.87                                     | 23.45               | 6.01            | 1152                | 0.644                |
| 116   | UM0127134 | 01    | UdeM       | UDM-000775      | 73.20                                  | 82.73               | 20.93                                      | 83.07               | 45.22                             | 85.88               | -14.02                               | 31.94               | 1.20                                     | 37.47               | 5.34            | 1046                | 0.427                |
| 117   | UM0127135 | 01    | UdeM       | UDM-000776      | 65.86                                  | 88.45               | 29.57                                      | 86.80               | 42.50                             | 88.81               | -15.83                               | 29.77               | 5.21                                     | 45.01               | 4.99            | 1161                | 0.526                |
| 118   | UM0127153 | 01    | UdeM       | UDM-000933      | 45.02                                  | 65.77               | -0.56                                      | 75.63               | 23.49                             | 75.56               | -12.10                               | 25.09               | -5.41                                    | 36.92               | 5.11            | 1229                | 0.926                |
| 119   | UM0127154 | 01    | UdeM       | UDM-000934      | 69.73                                  | 78.13               | 30.28                                      | 81.67               | 28.42                             | 83.23               | -9.75                                | 51.09               | 5.62                                     | 60.39               | 5.09            | 1122                | 0.917                |
| 120   | UM0127191 | 01    | UdeM       | UDM-001223      | 47.30                                  | 72.72               | 25.58                                      | 69.47               | 25.29                             | 76.88               | -13.60                               | 36.57               | 6.13                                     | 47.60               | 5.09            | 1163                | 1.000                |
| 121   | UM0011080 | 01    | CHEMBRIDGE | 5541594         | 63.35                                  | 73.89               | -6.16                                      | 36.21               | 38.10                             | 75.39               | -10.29                               | 6.91                | 2.84                                     | 5.90                | 4.87            | 841                 | 0.955                |
| 122   | UM0052184 | 01    | SPECS      | AA-768/33245010 | 44.05                                  | 86.60               | -8.30                                      | 44.16               | 30.57                             | 79.14               | -1.93                                | 25.69               | 3.03                                     | 35.15               | NT              | NT                  | 0.776                |

NT= Non tested

Table S3. Structure-Activity Relationship (SAR) analysis of Cpd 16. Chemical structure and IC<sub>50</sub> values obtained in FP for the different analogs of Cpd 16 are presented.

| Cpd # | UM number | Molecular mass | Molecular formula                                                                | Structure | FP - IC <sub>50</sub> (μM) |
|-------|-----------|----------------|----------------------------------------------------------------------------------|-----------|----------------------------|
| 16    | UM0113574 | 407.79         | C <sub>16</sub> H <sub>13</sub> ClF <sub>3</sub> NO <sub>4</sub> S               |           | 18.4 ± 10.2                |
| 123   | UM0131803 | 373.35         | C <sub>16</sub> H <sub>14</sub> F <sub>3</sub> NO <sub>4</sub> S                 |           | 7.2                        |
| 124   | UM0131783 | 291.32         | C <sub>14</sub> H <sub>13</sub> NO <sub>4</sub> S                                |           | 68.6 ± 18.5                |
| 125   | UM0131784 | 393.76         | C <sub>15</sub> H <sub>11</sub> ClF <sub>3</sub> NO <sub>4</sub> S               |           | 11.9 ± 7.2                 |
| 126   | UM0131785 | 360.21         | C <sub>14</sub> H <sub>11</sub> Cl <sub>2</sub> NO <sub>4</sub> S                |           | 4.3                        |
| 127   | UM0131786 | 325.77         | C <sub>14</sub> H <sub>12</sub> ClNO <sub>4</sub> S                              |           | 187.4                      |
| 128   | UM0131787 | 393.76         | C <sub>15</sub> H <sub>11</sub> ClF <sub>3</sub> NO <sub>4</sub> S               |           | 8.4                        |
| 129   | UM0041779 | 359.32         | C <sub>15</sub> H <sub>12</sub> F <sub>3</sub> NO <sub>4</sub> S                 |           | 8.5                        |
| 130   | UM0113524 | 428.21         | C <sub>15</sub> H <sub>10</sub> Cl <sub>2</sub> F <sub>3</sub> NO <sub>4</sub> S |           | 7.8                        |
| 131   | UM0113530 | 360.21         | C <sub>14</sub> H <sub>11</sub> Cl <sub>2</sub> NO <sub>4</sub> S                |           | 70.5                       |
| 132   | UM0113515 | 415.43         | C <sub>19</sub> H <sub>20</sub> F <sub>3</sub> NO <sub>4</sub> S                 |           | 26.1                       |
| 133   | UM0113549 | 370.76         | C <sub>14</sub> H <sub>11</sub> ClN <sub>2</sub> O <sub>6</sub> S                |           | 5.4                        |
| 15    | UM0113559 | 350.78         | C <sub>15</sub> H <sub>11</sub> ClN <sub>2</sub> O <sub>4</sub> S                |           | 5.7 ± 2.8                  |
| 136   | UM0131792 | 293.34         | C <sub>14</sub> H <sub>15</sub> NO <sub>4</sub> S                                |           | No inhibition              |
| 137   | UM0131779 | 338            | C <sub>16</sub> H <sub>16</sub> ClNO <sub>3</sub> S                              |           | No inhibition              |

| Cpd # | UM number | Molecular mass | Molecular formula                                                                | Structure | FP - IC <sub>50</sub> (μM) |
|-------|-----------|----------------|----------------------------------------------------------------------------------|-----------|----------------------------|
| 138   | UM0032816 | 387.28         | C <sub>17</sub> H <sub>16</sub> Cl <sub>2</sub> O <sub>4</sub> S                 |           | No inhibition              |
| 139   | UM0131782 | 391.23         | C <sub>14</sub> H <sub>12</sub> Cl <sub>2</sub> N <sub>2</sub> O <sub>3</sub> S  |           | No inhibition              |
| 140   | UM0131780 | 337.82         | C <sub>16</sub> H <sub>16</sub> ClNO <sub>3</sub> S                              |           | No inhibition              |
| 141   | UM0131777 | 372.27         | C <sub>16</sub> H <sub>15</sub> Cl <sub>2</sub> NO <sub>3</sub> S                |           | No inhibition              |
| 142   | UM0041694 | 392.78         | C <sub>15</sub> H <sub>12</sub> ClF <sub>3</sub> N <sub>2</sub> O <sub>3</sub> S |           | No inhibition              |
| 143   | UM0131778 | 429.31         | C <sub>16</sub> H <sub>10</sub> F <sub>7</sub> NO <sub>3</sub> S                 |           | No inhibition              |
| 144   | UM0113371 | 387.33         | C <sub>15</sub> H <sub>12</sub> F <sub>3</sub> N <sub>3</sub> O <sub>4</sub> S   |           | No inhibition              |
| 145   | UM0109778 | 382.27         | C <sub>16</sub> H <sub>16</sub> BrNO <sub>3</sub> S                              |           | No inhibition              |
| 146   | UM0131761 | 237.24         | C <sub>9</sub> H <sub>10</sub> F <sub>3</sub> NOS                                |           | No inhibition              |
| 147   | UM0131763 | 375.79         | C <sub>16</sub> H <sub>13</sub> ClF <sub>3</sub> NO <sub>2</sub> S               |           | No inhibition              |
| 148   | UM0131764 | 391.79         | C <sub>16</sub> H <sub>13</sub> ClF <sub>3</sub> NO <sub>3</sub> S               |           | No inhibition              |
| 149   | UM0131772 | 425.35         | C <sub>17</sub> H <sub>13</sub> F <sub>6</sub> NO <sub>3</sub> S                 |           | No inhibition              |
| 150   | UM0131773 | 355.37         | C <sub>17</sub> H <sub>16</sub> F <sub>3</sub> NO <sub>2</sub> S                 |           | No inhibition              |
| 151   | UM0131774 | 457.34         | C <sub>17</sub> H <sub>13</sub> F <sub>6</sub> NO <sub>5</sub> S                 |           | 41.7                       |



| Cpd # | UM number | Molecular mass | Molecular formula                                                                | Structure | FP - IC <sub>50</sub> (μM) |
|-------|-----------|----------------|----------------------------------------------------------------------------------|-----------|----------------------------|
| 152   | UM0131775 | 387.37         | C <sub>17</sub> H <sub>16</sub> F <sub>3</sub> NO <sub>4</sub> S                 |           | 54.4                       |
| 153   | UM0131776 | 420.25         | C <sub>16</sub> H <sub>13</sub> BrF <sub>3</sub> NO <sub>2</sub> S               |           | No inhibition              |
| 154   | UM0131790 | 452.24         | C <sub>16</sub> H <sub>13</sub> BrF <sub>3</sub> NO <sub>4</sub> S               |           | 36.8                       |
| 155   | UM0131794 | 410.24         | C <sub>16</sub> H <sub>12</sub> Cl <sub>2</sub> F <sub>3</sub> NO <sub>2</sub> S |           | No inhibition              |
| 156   | UM0131795 | 442.24         | C <sub>16</sub> H <sub>12</sub> Cl <sub>2</sub> F <sub>3</sub> NO <sub>4</sub> S |           | 48.1                       |
| 157   | UM0131805 | 361.81         | C <sub>16</sub> H <sub>15</sub> ClF <sub>3</sub> NOS                             |           | No inhibition              |
| 158   | UM0131806 | 269.24         | C <sub>9</sub> H <sub>10</sub> F <sub>3</sub> NO <sub>3</sub> S                  |           | No inhibition              |
| 159   | UM0131811 | 393.81         | C <sub>16</sub> H <sub>15</sub> ClF <sub>3</sub> NO <sub>3</sub> S               |           | No inhibition              |
| 160   | UM0131831 | 379.4          | C <sub>16</sub> H <sub>20</sub> F <sub>3</sub> NO <sub>4</sub> S                 |           | 75.0                       |
| 161   | UM0131842 | 251.23         | C <sub>9</sub> H <sub>8</sub> F <sub>3</sub> NO <sub>2</sub> S                   |           | 8.3 ± 2.6                  |
| 164   | UM0131845 | 347.33         | C <sub>10</sub> H <sub>12</sub> F <sub>3</sub> NO <sub>5</sub> S <sub>2</sub>    |           | 6.0                        |
| 168   | UM0131878 | 347.4          | C <sub>16</sub> H <sub>20</sub> F <sub>3</sub> NO <sub>2</sub> S                 |           | No inhibition              |
| 169   | UM0132247 | 253.24         | C <sub>9</sub> H <sub>10</sub> F <sub>3</sub> NO <sub>2</sub> S                  |           | No inhibition              |
